# Supplementary material
Source: PubMed Central journal article supplement (PMC6545570)
Supplement: NIHMS1526839-supplement-6.pdf [file NIHMS1526839-supplement-6.pdf]

**Table S3.** Metabolites eliciting a  $\geq 2$ -fold change in IC50 for each antibiotic; related to Figure 2.

| Well | Biolog Metabolite                   | Ampicillin | Ciprofloxacin | Gentamicin |
|------|-------------------------------------|------------|---------------|------------|
| 1B01 | D-Serine                            | X          |               |            |
| 1B05 | D-GlucuronicAcid                    |            | X             |            |
| 1D01 | L-Asparagine                        |            | X             |            |
| 1E01 | L-Glutamine                         |            | X             |            |
| 1F10 | Glyoxylic Acid                      |            | X             | X          |
| 1G04 | L-Threonine                         |            | X             |            |
| 1G05 | L-Alanine                           |            | X             |            |
| 1G07 | Acetoacetic Acid                    |            | X             |            |
| 1H08 | Pyruvic Acid                        |            | X             |            |
| 2E02 | Caproic Acid                        |            | X             |            |
| 3A10 | L-AsparticAcid                      |            |               | X          |
| 3B02 | Glycine                             |            |               | X          |
| 3B05 | L-Leucine                           |            | X             |            |
| 3B11 | L-Threonine                         |            | X             |            |
| 3B12 | L-Tryptophan                        |            | X             |            |
| 3C02 | L-Valine                            | X          |               |            |
| 3C08 | D-Serine                            |            | X             |            |
| 3D11 | Putrescine                          |            |               | X          |
| 3D12 | Agmatine                            |            |               | X          |
| 3E02 | $\beta$ -Phenylethyl-amine          |            |               | X          |
| 3E03 | Tyramine                            |            |               | X          |
| 3F02 | Adenine                             |            | X             |            |
| 3F12 | Inosine                             |            | X             |            |
| 3H06 | Ala-Leu                             |            | X             |            |
| 4A03 | Pyrophosphate                       |            | X             | X          |
| 4B09 | Guanosine-3'-monophosphate          |            | X             |            |
| 4B11 | Guanosine-2',3'-cyclicmonophosphate |            | X             |            |

**Table S4.** Metabolic pathways enriched from metabolites that elicited  $\geq 2$ -fold change in ciprofloxacin (CIP) IC<sub>50</sub>, identified by Metabolite Set Enrichment Analysis in Ecocyc; related to Figure 2.

| <b>Metabolic Pathways Enriched from Metabolite Screening "Hits" for CIP</b> | <b>p-value</b> |
|-----------------------------------------------------------------------------|----------------|
| Aminoacyl-tRNA charging                                                     | 1.98E-06       |
| tRNA charging                                                               | 1.98E-06       |
| Proteinogenic amino acids biosynthesis                                      | 2.50E-06       |
| Amino acids biosynthesis                                                    | 4.32E-06       |
| Amino acids degradation                                                     | 1.27E-05       |
| L-Tryptophan biosynthesis                                                   | 2.32E-05       |
| L-Tryptophan biosynthesis                                                   | 2.32E-05       |
| Degradation / utilization / assimilation                                    | 5.27E-05       |
| Metabolic clusters                                                          | 1.03E-04       |
| L-Asparagine biosynthesis                                                   | 1.37E-04       |
| L-Asparagine biosynthesis I                                                 | 1.37E-04       |
| Superpathway of L-asparagine biosynthesis                                   | 1.37E-04       |
| Proteinogenic amino acids degradation                                       | 1.59E-04       |
| Adenine and adenosine salvage III                                           | 2.47E-04       |
| Nucleic acids processing                                                    | 4.51E-04       |
| Adenine and adenosine salvage                                               | 6.12E-04       |
| L-Alanine biosynthesis II                                                   | 7.24E-04       |
| Superpathway of aromatic amino acid biosynthesis                            | 7.66E-04       |

**Table S7.** Metabolic pathways predicted to participate in ampicillin (AMP), ciprofloxacin (CIP) or gentamicin (GENT) lethality; related to Figure 3.

| <b>Metabolic Pathways Identified by White-Box Machine Learning</b>             | <b>p<sub>AMP</sub></b> | <b>p<sub>CIP</sub></b> | <b>p<sub>GENT</sub></b> |
|--------------------------------------------------------------------------------|------------------------|------------------------|-------------------------|
| Superpathway of sulfate assimilation and cysteine biosynthesis                 | 1.32E-05               | 1.01E-04               | 4.80E-05                |
| Superpathway of histidine, purine, and pyrimidine biosynthesis                 | 1.23E-06               | 2.89E-03               | 4.80E-05                |
| Superpathway of glycolysis, pyruvate dehydrogenase, TCA, and glyoxylate bypass | 1.32E-05               | 2.11E-02               | 6.91E-05                |
| Superpathway of purine nucleotides de novo biosynthesis II                     | 6.34E-06               | 2.97E-03               | 2.01E-03                |
| Pentose phosphate pathway                                                      | 4.22E-05               | 2.97E-03               | 2.01E-03                |
| Superpathway of phenylethylamine degradation                                   | 6.29E-04               | 2.97E-03               | 1.79E-03                |
| Inosine-5'-phosphate biosynthesis I                                            | 7.85E-04               | 2.97E-03               | 2.01E-03                |
| Superpathway of 5-aminoimidazole ribonucleotide biosynthesis                   | 7.85E-04               | 2.97E-03               | 2.07E-02                |
| Superpathway of glycolysis and the Entner-Doudoroff pathway                    | 4.27E-02               | 2.25E-02               | 1.20E-04                |
| L-Arginine biosynthesis I (via L-ornithine)                                    | 2.79E-04               | 1.00E+00               | 8.10E-04                |
| Salvage pathways of pyrimidine ribonucleotides                                 | 4.22E-05               | 1.18E-01               | 8.41E-02                |
| TCA cycle I (prokaryotic)                                                      | 7.85E-04               | 3.05E-01               | 6.32E-02                |
| Superpathway of glyoxylate bypass and TCA                                      | 6.29E-04               | 5.37E-01               | 1.36E-01                |

**Table S8.** Measured intracellular metabolite concentrations under adenine or uracil supplementation.

Data are reported as mean  $\pm$  SD and computed from LC-MS/MS measurements from n = 3 biological replicates; related to Figure 6.

| Metabolite                                 | Units   | Control             | Adenine             | Uracil              |
|--------------------------------------------|---------|---------------------|---------------------|---------------------|
| $\alpha$ -Ketoglutarate                    | $\mu$ M | 271.50 $\pm$ 53.84  | 192.98 $\pm$ 49.97  | 212.32 $\pm$ 23.95  |
| 2-Phosphoglycerate /<br>3-Phosphoglycerate | mM      | 1.56 $\pm$ 0.32     | 1.10 $\pm$ 0.23     | 1.26 $\pm$ 0.23     |
| Acetyl-CoA                                 | mM      | 7.46 $\pm$ 1.32     | 7.83 $\pm$ 1.16     | 4.69 $\pm$ 0.44     |
| Aconitate                                  | $\mu$ M | 253.55 $\pm$ 189.21 | 112.84 $\pm$ 61.92  | 147.47 $\pm$ 35.42  |
| Adenine                                    | mM      | 0.06 $\pm$ 0.07     | 3.45 $\pm$ 2.88     | 0.08 $\pm$ 0.09     |
| Adenosine                                  | mM      | 0.15 $\pm$ 0.03     | 1.37 $\pm$ 1.12     | 0.14 $\pm$ 0.04     |
| ADP                                        | mM      | 0.45 $\pm$ 0.13     | 0.75 $\pm$ 0.16     | 0.28 $\pm$ 0.017    |
| AMP                                        | $\mu$ M | 176.79 $\pm$ 83.42  | 650.14 $\pm$ 329.04 | 148.52 $\pm$ 46.23  |
| ATP                                        | mM      | 9.26 $\pm$ 2.78     | 9.41 $\pm$ 7.80     | 5.04 $\pm$ 1.20     |
| Citrate                                    | mM      | 0.53 $\pm$ 0.08     | 0.53 $\pm$ 0.27     | 0.89 $\pm$ 0.25     |
| Fructose biphosphate                       | mM      | 6.00 $\pm$ 3.65     | 4.46 $\pm$ 1.74     | 4.85 $\pm$ 2.39     |
| Fructose-6-phosphate                       | mM      | 1.38 $\pm$ 0.21     | 1.22 $\pm$ 0.14     | 1.37 $\pm$ 0.18     |
| Fumarate                                   | mM      | 1.96 $\pm$ 0.38     | 1.46 $\pm$ 0.35     | 1.56 $\pm$ 0.26     |
| Glucose 6-phosphate                        | mM      | 4.70 $\pm$ 0.63     | 4.10 $\pm$ 0.66     | 4.60 $\pm$ 0.17     |
| Glyceraldehyde 3-phosphate                 | a.u.    | 1.00 $\pm$ 0.51     | 0.83 $\pm$ 0.25     | 1.05 $\pm$ 0.38     |
| Glyoxylate                                 | $\mu$ M | 777.74 $\pm$ 447.46 | 935.03 $\pm$ 484.73 | 582.14 $\pm$ 158.61 |
| Isocitrate                                 | $\mu$ M | 11.16 $\pm$ 7.27    | 9.68 $\pm$ 4.37     | 13.93 $\pm$ 4.81    |
| Malate                                     | mM      | 26.65 $\pm$ .797    | 13.88 $\pm$ 3.27    | 14.35 $\pm$ 0.68    |
| NAD+                                       | a.u.    | 1.00 $\pm$ 0.18     | 1.09 $\pm$ 0.13     | 0.84 $\pm$ 0.04     |
| NADH                                       | a.u.    | 1.00 $\pm$ 0.20     | 0.91 $\pm$ 0.13     | 0.71 $\pm$ 0.08     |
| NADP+                                      | a.u.    | 1.00 $\pm$ 0.30     | 1.05 $\pm$ 0.27     | 0.79 $\pm$ 0.18     |
| NADPH                                      | a.u.    | 1.00 $\pm$ 0.50     | 0.49 $\pm$ 0.22     | 1.42 $\pm$ 0.62     |
| Oxaloacetate                               | nM      | 21.93 $\pm$ 25.11   | 35.39 $\pm$ 33.42   | 11.72 $\pm$ 10.56   |
| Phosphoenoylpyruvate                       | $\mu$ M | 140.29 $\pm$ 36.81  | 81.94 $\pm$ 21.17   | 125.74 $\pm$ 30.46  |
| Pyruvate                                   | mM      | 2.12 $\pm$ 1.55     | 2.71 $\pm$ 2.32     | 1.43 $\pm$ 0.41     |
| Succinyl-CoA                               | a.u.    | 1.00 $\pm$ 1.00     | 0.90 $\pm$ 0.58     | 0.59 $\pm$ 0.28     |
| Succinate                                  | mM      | 1.50 $\pm$ 0.66     | 2.17 $\pm$ 0.43     | 1.19 $\pm$ 0.28     |
| UDP                                        | $\mu$ M | 69.04 $\pm$ 30.18   | 122.73 $\pm$ 108.85 | 267.81 $\pm$ 122.37 |
| UMP                                        | $\mu$ M | 6.66 $\pm$ 6.39     | 13.90 $\pm$ 10.30   | 30.38 $\pm$ 20.35   |
| Uracil                                     | mM      | 0.01 $\pm$ 0.00     | 0.04 $\pm$ 0.01     | 21.47 $\pm$ 8.92    |
| Uridine                                    | $\mu$ M | 19.00 $\pm$ 6.05    | 101.35 $\pm$ 62.72  | 49.58 $\pm$ 20.58   |
| UTP                                        | mM      | 1.66 $\pm$ 0.50     | 1.08 $\pm$ 0.60     | 3.17 $\pm$ 0.56     |

**Table S9.** Oligonucleotides used for verifying *E. coli* gene deletions; related to STAR Methods.

| <b>Oligonucleotides</b>                           |
|---------------------------------------------------|
| <i>glyA</i> forward primer: AGAAATCCGTTTCCGGTTGC  |
| <i>glyA</i> reverse primer: CCCAGAACGGTATCACCTGG  |
| <i>purD</i> forward primer: TATTGCGATGCTCTTCACCGA |
| <i>purD</i> reverse primer: CGTTTGTGATCCTGGCTGGT  |
| <i>purE</i> forward primer: GAGAGTTGTGCACCACAGGA  |
| <i>purE</i> reverse primer: CAGCACTTCGTCGGTCTGG   |
| <i>purK</i> forward primer: CAGTTACTTGCCGAACGCAG  |
| <i>purK</i> reverse primer: TTTTGTGTCCAGTGACCGCT  |
| <i>purM</i> forward primer: ATTGACGCGGGTAATGCTCT  |
| <i>purM</i> reverse primer: CCGCGACATCGTAATCCTCA  |
| <i>pyrC</i> forward primer: TGGTGCATGGTGAAGTGACA  |
| <i>pyrC</i> reverse primer: CCAGCGTGTGATCAGTCAGT  |
| <i>pyrE</i> forward primer: GGTGGATTCCGGCATTGAGT  |
| <i>pyrE</i> reverse primer: TGCGGCACAGTTGCAGTAAT  |
| Keio insert primer: GATGTTTCGCTTGGTGGTCG          |
